# Supplementary material for: Unbiased Quantitative Single-Cell Morphometric Analysis to Identify Microglia Reactivity in Developmental Brain Injury
Source: MDPI journal article supplement (doi:10.3390/life13040899), 2023-03-28
Supplement: s1 [file s1]

A1

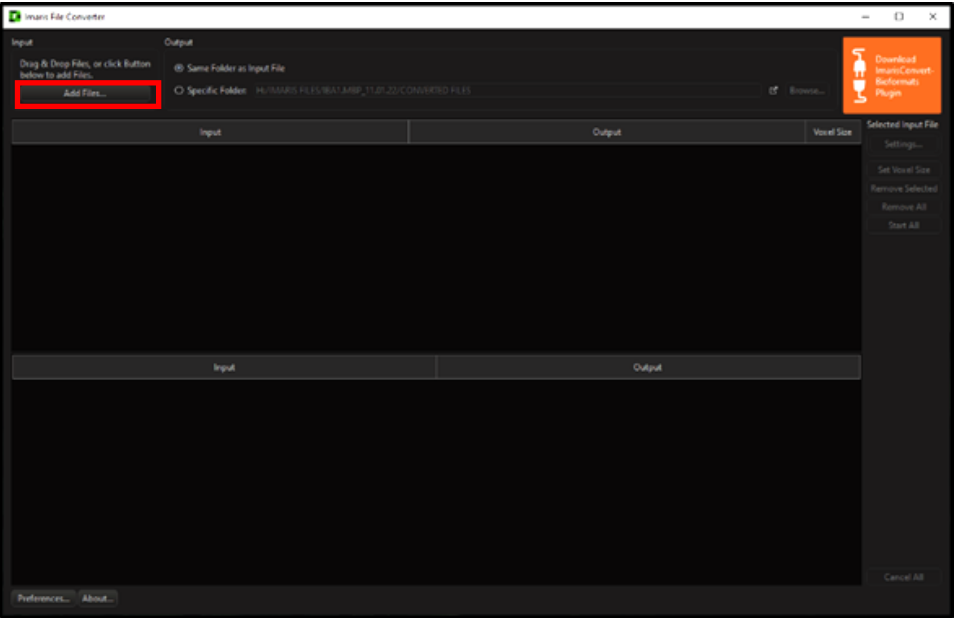

A2

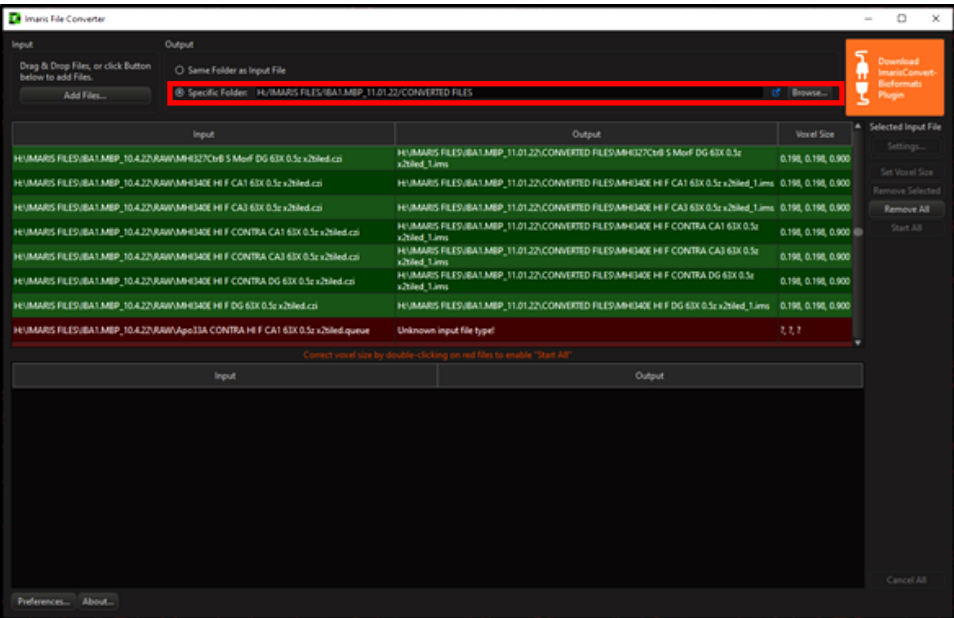

A3

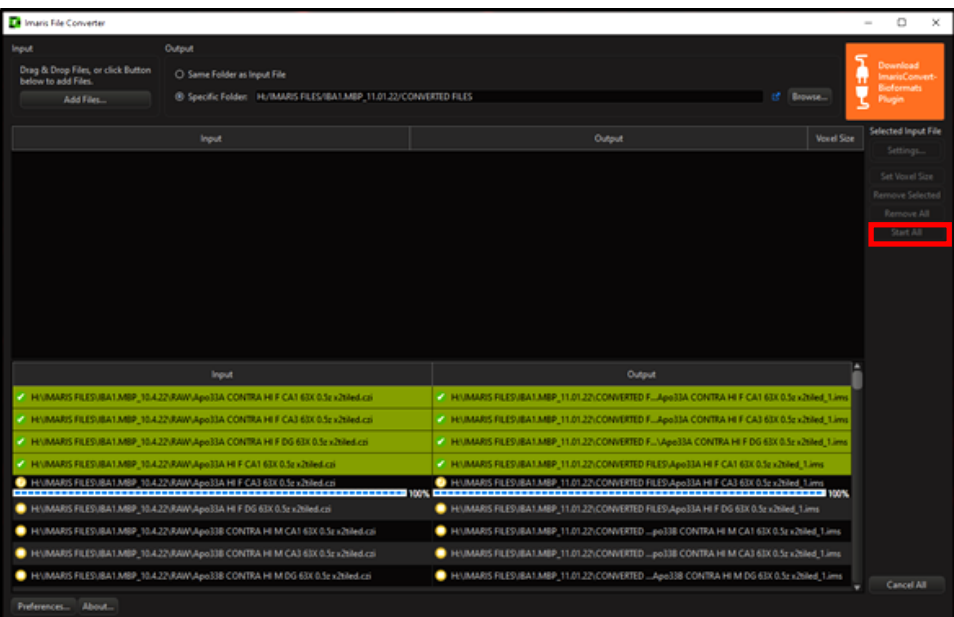

Supplemental Figure S1. Use of Imaris File Converter Software .

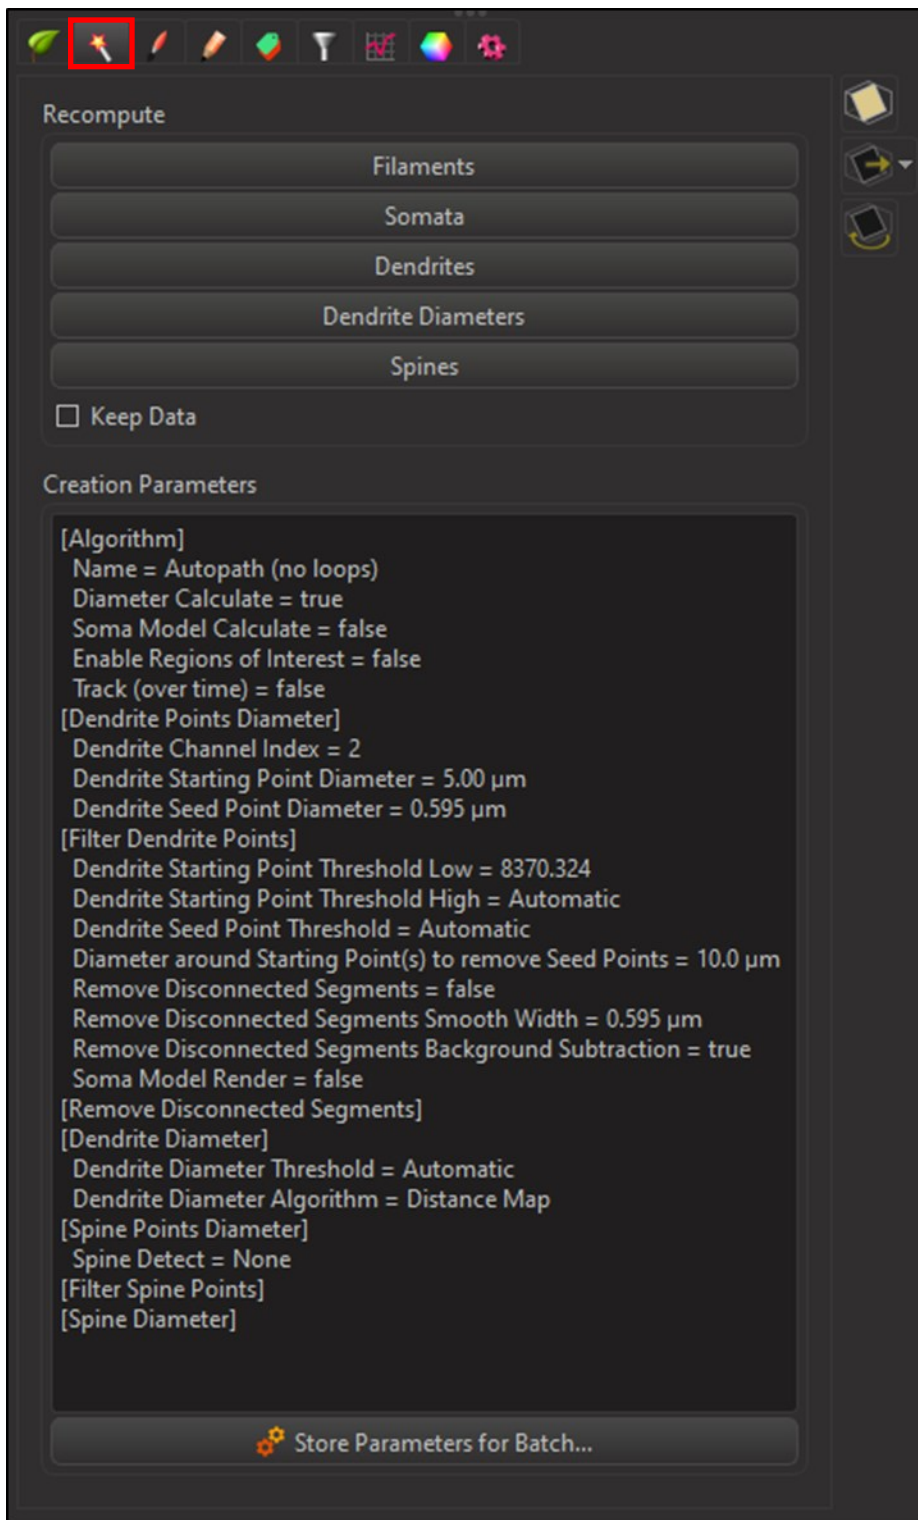

**Supplemental Figure S2.** After a render is created, create a protocol by saving the object characteristics using the 'Magic Wand' icon



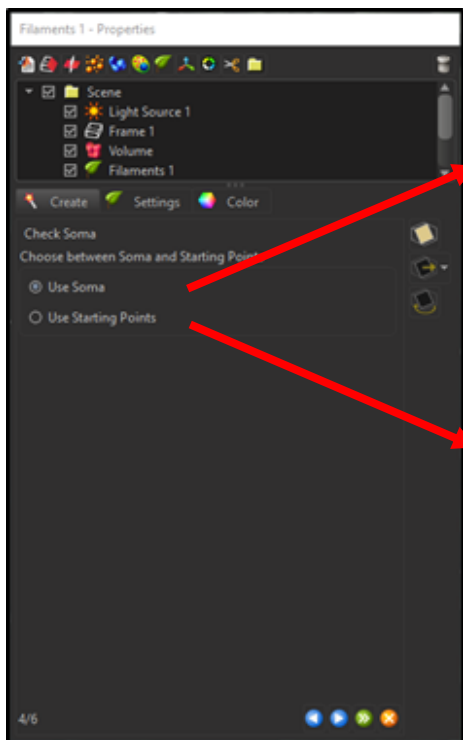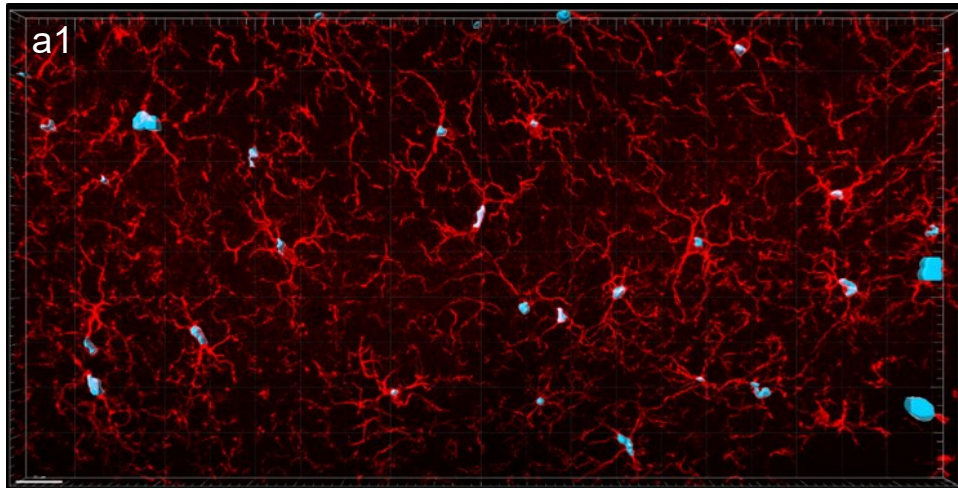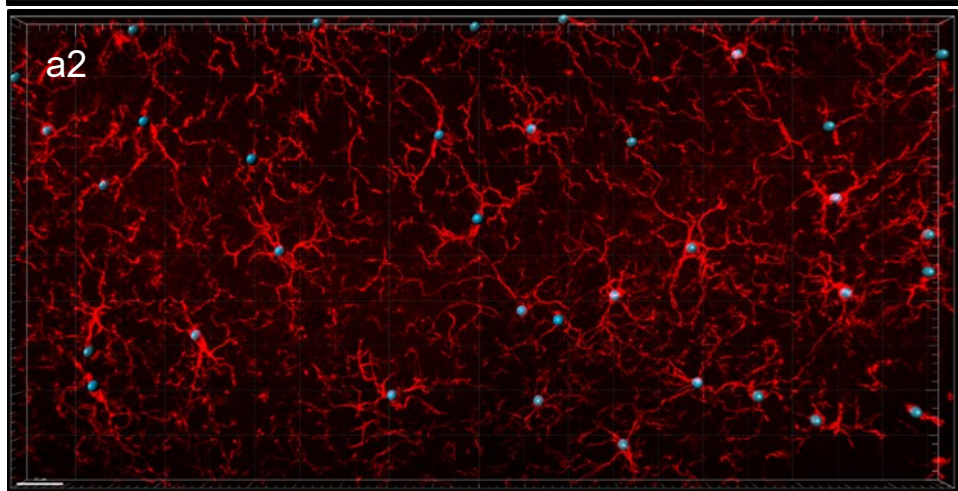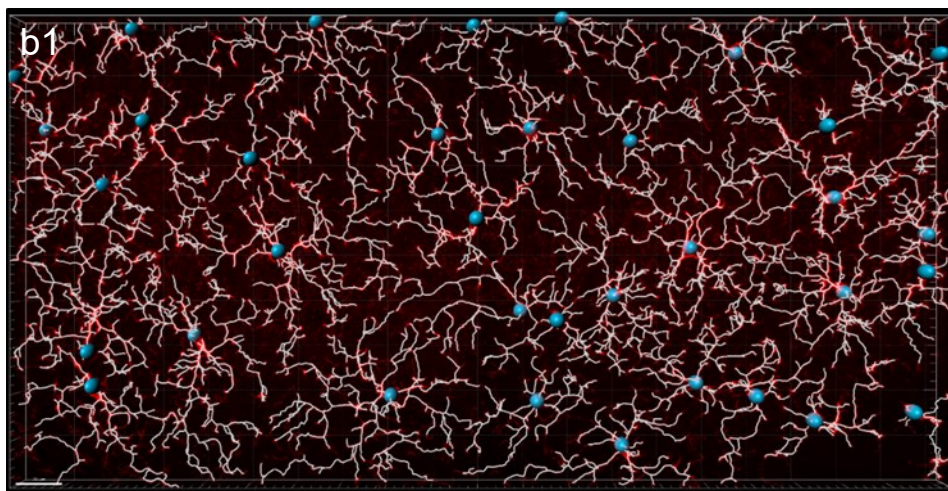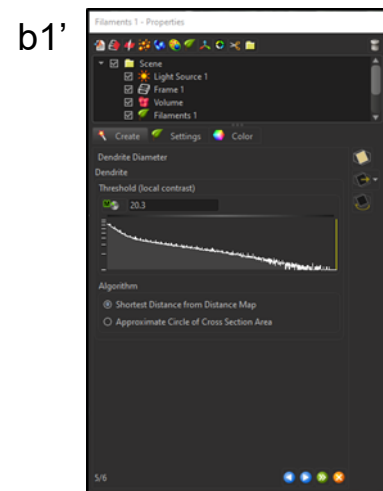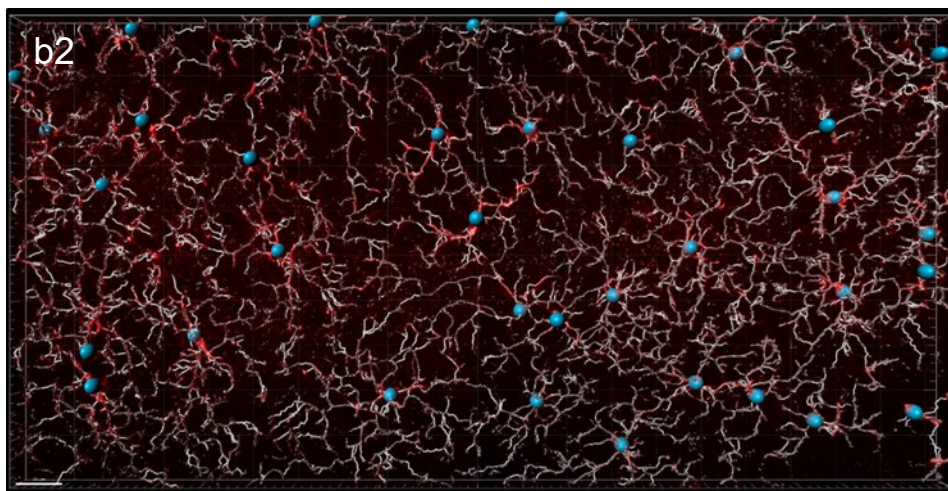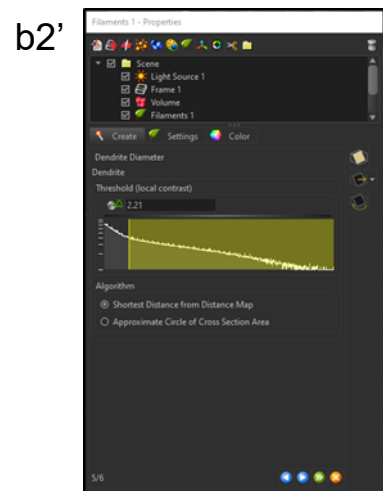

**Supplemental Figure S3.** Soma determination and setting filament diameter.
